# Supplementary material
Source: publisher site journal article supplement (https://www.dovepress.com/article/383959)
Supplement: Supplementary file 1 [file get_supplementary_file.php]

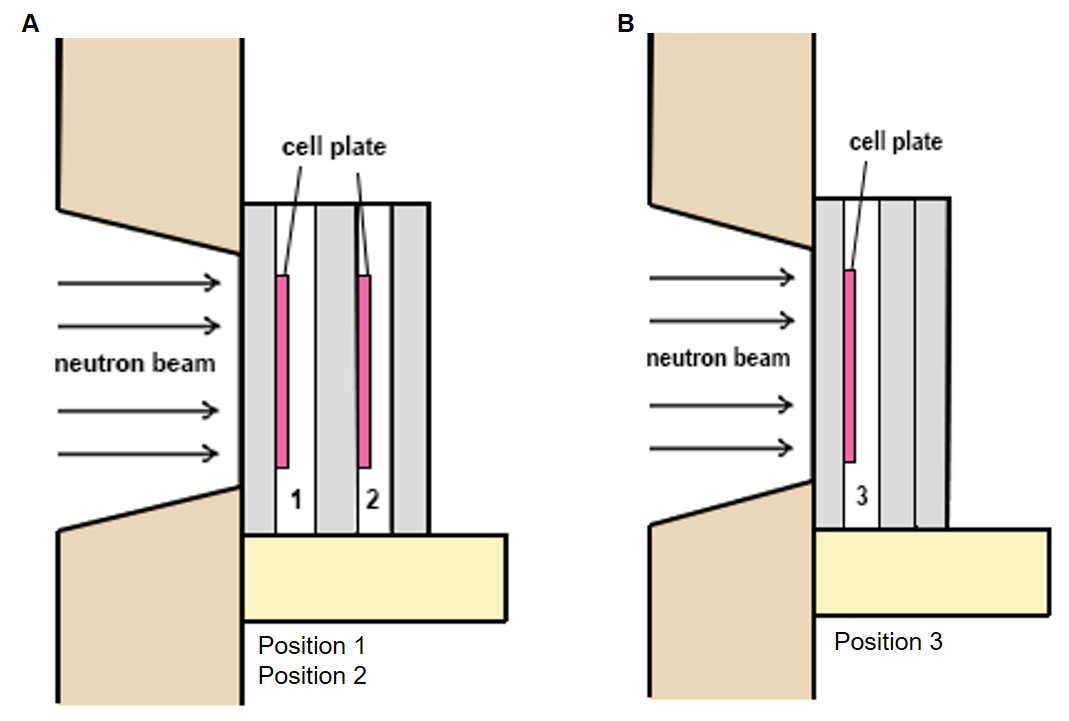


**Supplemental Figure 1 Neutron irradiation setup position of cell plates and holders.**

The neutron irradiation setup was adapted from the boron neutron capture therapy setup position provided by Dr. Hong-Ming Liu. (A) The setup position for the colony formation assay. (B) The setup position for immunocytochemistry, cell cycle analysis, caspase-3 apoptosis, and Western blot assays.
